# Supplementary material for: An iron-based metal–organic framework as a novel dispersive solid-phase extraction sorbent for the efficient adsorption of tetrabromobisphenol A from environmental water samples
Source: Royal Society of Chemistry journal article supplement (doi:10.1039/d2ay01287a), 2023-01-01
Supplement: d2ay01287a1.pdf [file d2ay01287a1.pdf]

# Electronic Supplementary Information

Iron-based metal–organic framework as novel dispersive  
solid-phase extraction sorbents for efficient adsorption of  
tetrabromobisphenol A from environment water samples

Ling-Juan Wang<sup>a</sup>, Wei Han<sup>b</sup>, Ting-Ting Lou<sup>b</sup>, Lin-Lin Ma<sup>a</sup>, Ya-Bing Xiao<sup>b</sup>, Zhou Xu<sup>a</sup>,  
Mao-Long Chen<sup>a</sup>, Yun-Hui Cheng<sup>a</sup>, Li Ding<sup>a\*</sup>

a. School of Food Science and Bioengineering, Changsha University of Science &  
Technology, Changsha 410114, China.

b. Technical Center for Animal, Plant, Foodstuffs and Industrial Product Safety,  
Tianjin Customs, Tianjin 300457, China.

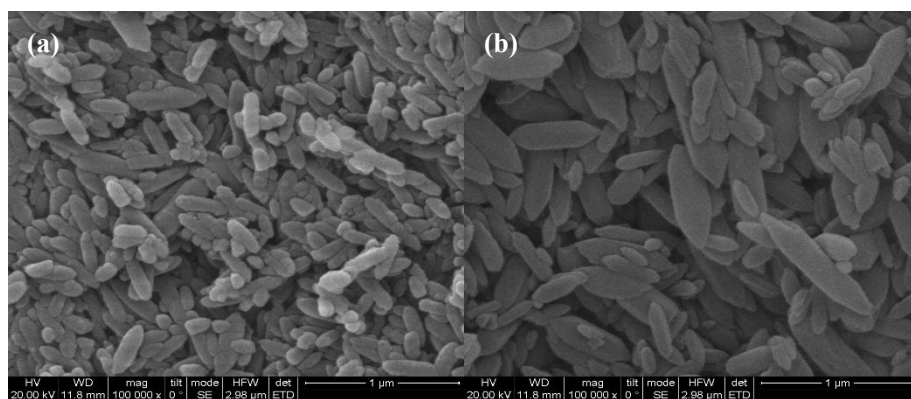

Fig. S1. The SEM image of Fe-MIL-88-NH<sub>2</sub> before(a) and after(b)

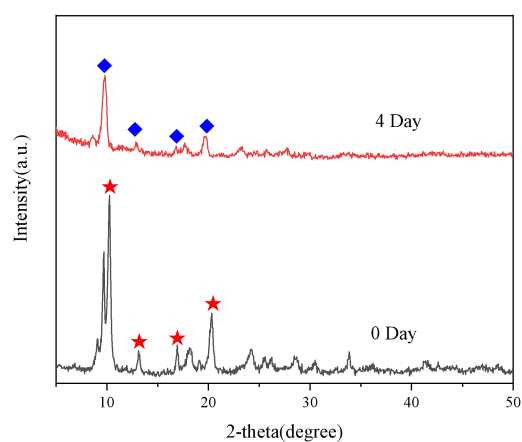

adsorption.

Fig. S2. The XRD of Fe-MIL-88-NH<sub>2</sub> before(a) and after(b) adsorption.

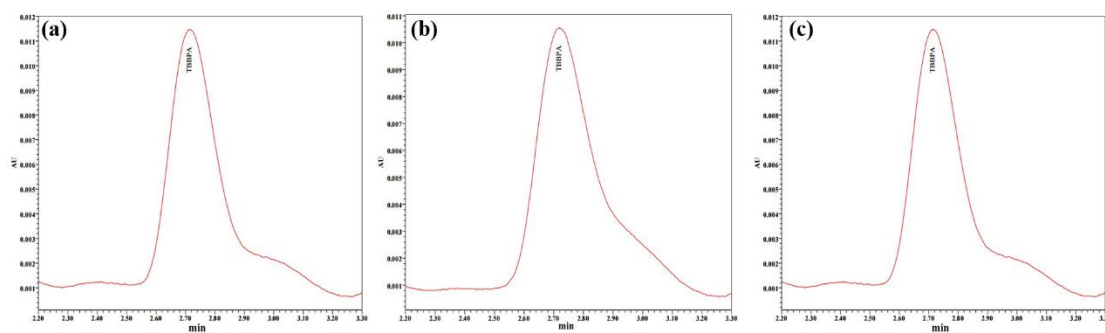

Fig. S3. The chromatogram of the real samples (a) river water, (b) lake water and (c) plastic products factory wastewater.

Table S1. Adsorption isotherm parameters of TBBPA on Fe-MIL-88-NH<sub>2</sub>

| Compound | Langmuir                            |                                 |       | Freundlich                                                       |      |       |
|----------|-------------------------------------|---------------------------------|-------|------------------------------------------------------------------|------|-------|
|          | $Q_{\max}$<br>(mg g <sup>-1</sup> ) | $K_L$<br>(mL mg <sup>-1</sup> ) | $R^2$ | $K_F$<br>(mg <sup>1-1/n</sup> L <sup>1/n</sup> g <sup>-1</sup> ) | 1/n  | $R^2$ |
| TBBPA    | 46.05                               | 0.17                            | 0.95  | 8.27                                                             | 0.39 | 0.91  |

Table S2. The parameters of pseudo-first-order and pseudo-second-order models for the adsorption

of TBBPA on Fe-MIL-88-NH<sub>2</sub>.

| Kinetic model | pseudo-first-order kinetic model |                            |        | pseudo-second-order kinetic model |                                   |        |
|---------------|----------------------------------|----------------------------|--------|-----------------------------------|-----------------------------------|--------|
|               | $Q_e$ (mg·g <sup>-1</sup> )      | $k_1$ (min <sup>-1</sup> ) | $R^2$  | $Q_e$ (mg·g <sup>-1</sup> )       | $k_2$ (g·(mg·min) <sup>-1</sup> ) | $R^2$  |
| Value         | 63.51                            | 0.0539                     | 0.4157 | 22.75                             | 0.0412                            | 0.9996 |
